# Supplementary material for: Risk Factors for Cholangiocarcinoma, Role of Diabetes Mellitus and Hepatitis B Virus Infection in the Intrahepatic and Extrahepatic Cholangiocarcinoma: A case-control study in China
Source: Research Square preprint supplement (doi:10.21203/rs.3.rs-6483124/v1), 2025-04-22
Supplement: Supplementary file 1 [file fd97c927286fd786ff1693ae.docx]

**Flowchart Steps: Cases and controls**

| **Define the Study Population**  Identify the total population from which cases and controls were selected (e.g., hospital records) |
| --- |

| **Identify Cases & Controls** |
| --- |

| **CCA Cases** Individuals with the condition/disease |
| --- |

| **Controls** Individuals without the condition/disease |
| --- |

| **Random Sampling**  The sample size was measured by using computerized software (statulator) |
| --- |

| **For CCA cases** pathologically diagnosed |
| --- |

| **For controls** randomly selected from eligible non-cases (match on age, sex, date of diagnosis) by using a random number generator |
| --- |

| **Matching**  Check sample size adequacy using statulator |
| --- |

| **Final Case-Control Sample Ready for Analysis**  Data is ready for statistical comparison |
| --- |

**STROBE Statement- checklists**

|  | **Item**  **No** | **Recommendation** |
| --- | --- | --- |
| **Title and abstract** | **1** | 1. Risk Factors for Cholangiocarcinoma, Role of Diabetes Mellitus and Hepatitis B Virus Infection in the Intrahepatic and Extrahepatic Cholangiocarcinoma: A case-control study in China. 2. We conducted a population-based case-control study in China to evaluate the effects of DM, HBV infection, and other possible risk factors for cholangiocarcinoma, including intrahepatic and extrahepatic cholangiocarcinoma. This study involved 245 CCA patients [168 extrahepatic cholangiocarcinoma (eCCA) and 77 intrahepatic cholangiocarcinoma (iCCA)], and 490 healthy controls were enrolled to analyze risk factors and their possible corrections in cholangiocarcinoma by analyzing data in the Conditional logistic regression model. Diabetes mellitus, hepatitis B virus (HBV) infection, cholecystolithiasis, choledocholithiasis, hepatolithiasis, cholecystectomy history, and thyroid diseases were significantly and positively correlated with cholangiocarcinoma (CCA), with the adjusted odds ratios AOR= 1.41, 0.35, 1.70, 5.40, 0.30, 0.49, 5.42, respectively. Diabetes mellitus is divided into two categories, without complication AOR=0.21, with complication AOR=0.46, were also the significant risk factors for CCA. In the subgroup analyses, results of eCCA Cholelithiasis (AOR=1.51), CBD stones (AOR=4.51), hepatolithiasis (AOR =0.29), thyroid diseases (AOR =8.56) were significant for eCCA. Diabetes mellitus without complication (AOR=0.43) and with complication (AOR=0.70) was also a significant risk factor for eCCA. For iCCA, cholelithiasis (AOR=4.91), cholecystectomy (AOR=0.39), hepatolithiasis (AOR= 0.34) and HBV infection (AOR=0.20) were significant risk factors. However, diabetic mellitus (AOR=1.30) is also a significant risk factor for iCCA, while diabetics mellitus with complications. |
| **Introduction** |  |  |
| **Background:** | **2** | Diabetes mellitus (DM) and hepatitis B virus infection increase the risk of cholangiocarcinoma, including intrahepatic and extrahepatic cholangiocarcinoma, but their role in cholangiocarcinoma development remains unclear. Here, we conducted a population-based case-control study in China to evaluate the effects of DM, HBV infection, and other possible risk factors for cholangiocarcinoma. |
| **Objectives** | **3** | The study aims to identify the risk factors for cholangiocarcinoma and the role of the risk factors in intrahepatic and extrahepatic cholangiocarcinoma. |
| **Methods** |  |  |
| **Study design** | **4** | A hospital-based case control study. |
| **Setting** | **5** | All patients and Control subjects were chosen from The Second Affiliated Hospital of Harbin Medical University between January 2019 and June 2024. Control subjects were chosen who had visited for a routine checkup during the same time the CCA cases were selected. |
| **Participants** | **6** | We conducted Control subject, matched 2:1 (490:245), with a Total of 735 cases (245 cases with pathologically diagnosed CCA and 490 healthy controls). Inclusion criteria for the participants: Age between 30 and 90 years old, Symptoms with the risk factors of CCA, pathologically diagnosed CCA, Cases with clinical, biochemical, and radiological information all found in the data system,  Exclusion criteria: Age below 30 and above 90 years old, Cases with missing any data regarding, Cases without radiologic information, Ampulla of Vater carcinoma. |
| **Variables** | **7** | The dependent variables are the control group and pathologically diagnosed cholangiocarcinoma cases, including intrahepatic and extrahepatic subtypes, which is the outcome in our study. The independent variables are all the risk factors for cholangiocarcinoma, which is the exposure. Therefore, in addition to the well-known risk factors listed hepatolithiasis, PSC, liver flukes, biliary tract cysts, specific toxins, IBD, genetic polymorphism, alcoholic cirrhosis, tobacco, chronic liver diseases, cholecystectomy, choledocholithiasis, cholecystolithiasis, obesity, diabetes mellitus, chronic pancreatitis, alcoholic liver disease, thyroid diseases, pancreatic cancer, hepatitis B virus (HBV) and hepatitis C virus (HCV) infection. The association between outcome and exposure is measured in terms of odds ratio. The logistic regression yields an odds ratio and a statistical significance (P) value for each independent variable; this allows us to understand whether or not the independent variables are significantly associated with caseness, and, if they are, what the effect sizes are, as exemplified by the odds ratios. |
| **Data sources/**  **measurement** | **8** | We conducted CCA case and control groups. All CCA cases chosen who were diagnosed pathologically with CCA. Control subjects were randomly selected from among individuals who had visited The Second Affiliated Hospital of Harbin Medical University for a routine checkup while the CCA cases were selected. We randomized the control group by using a random number generator. We include cases between ages 30 and 90 years old with symptoms and risk factors of CCA, pathologically diagnosed CCA, and cases with clinical, biochemical, and radiological information, which are all found in the data system. We excluded cases below ages 30 and above 90 years old, without radiologic information, and ampulla of Vater carcinoma. In the control group, those diagnosed with other cancers were also excluded. Gallbladder carcinoma and hilar cholangiocarcinoma were included as extrahepatic cholangiocarcinoma. Patient records were manually and retrospectively reviewed to extract demographical and clinical data and risk factors. All the Relevant data were obtained by retrospectively reviewing patient data records from the general surgery department of The Second Affiliated Hospital of Harbin Medical University data systems, which a physician simultaneously documented in a structured data collection sheet. |
| **Bias** | **9** | In Case-control studies, due to their typically retrospective nature, they can be used to establish a correlation between exposures and outcomes but cannot establish causation. These studies simply attempt to find correlations between past events and the current state. The current study possesses several potential limitations: diagnostic bias cannot be dismissed as cancer patients undergo supplementary testing, resulting in a higher number of diagnoses compared to non-cancer individuals; this was a hospital-based study conducted at a single institution rather than a population-based design, which introduces the possibility of selection bias due to varying referral patterns; nevertheless, a hospital-based design may be more suitable for CCA given the low incidence and brief survival of CCA patients. |
|  | **10** | The sample size was determined by Statulator software using the following assumptions: 5% level of significance,80% power, 2:1 control to case ratio. Assuming that 4% of the subjects in the reference population have the factor of interest, and after applying continuity correction, the study would require a sample size of 245 for case group (control sample size of 490) to achieve a power of 80% for detecting a relative risk of 0.013 between the test and the reference group at a two-sided p-value of 0.05. |
| **Quantitative variables** | **11** | Independent variables are arranged in scales in the SPSS software. |
| **Statistical methods** | **12** | The statistical analyses were conducted using SPSS 20.0 software. The Mann-Whitney U test was used to compare continuous data, whereas the Pearson χ2 test with the Fisher exact test was utilized to analyze discrete variables. Univariate and multivariate correlation studies were conducted using conditional logistic regression with maximum likelihood estimations of parameter values to evaluate the risk for CCA. All variables were investigated with P-values of <0.05 in the univariate analyses and were subsequently adjusted to be examined in multiple logistic regression analysis. Logistic regression analysis was used to identify risk factors associated with CCA development and calculate ORs, adjusted ORs (AORs), and 95% confidence intervals (CIs). Two-sided tests with P < 0.05 were deemed statistically significant for all analyses. Furthermore, the population-attributable risk fraction for risk factors found to be statistically significant was determined using the adjusted odds ratio (AOR) of the underlying factor and its prevalence in the control group. |
| **Participants** | **13** | A total of 735 participants, 245 CCA cases and 490 controls, were enrolled. |
| **Descriptive**  **data** | **14** | Independent variable that is arranged in SPSS software and calculate their mean, median as our study requires. Pearson χ2 test with the Fisher exact test was utilized to analyze discrete variables |
| **Outcome data** | **15** | Dependent variables CCA cases 245 (168 cases extrahepatic cholangiocarcinoma and 77 cases intrahepatic cholangiocarcinoma). Independent variable the number of exposures is all the risk factor, in addition to the well-known risk factors, listed, smoking (69 in CCA cases, control 140), alcohol consumption (58 in CCA cases, control 130), obesity (65 in CCA cases, control 157), diabetes mellitus (without complication 43, with complication 22 in CCA cases; without complication 51, with complication 18 in control group), hypertension ( 64 in CCA cases, control 118), cholecystolithiasis (53 in CCA cases, control 170), choledocholithiasis (6 in CCA cases, control 50), hepatolithiasis (11 in CCA cases, controls 8), cholecystectomy (41 in CCA cases, control 39 ), ulcerative colitis ( 2 in CCA cases, control 16), alcoholic liver disease ( 2 in CCA cases, control 4), thyroid diseases ( 5 in CCA cases, control 49), chronic pancreatitis (no, control 7), pancreatic cancer ( 8 in CCA cases, control 6), hepatitis B virus (HBV) infection ( 33 in CCA cases, control 29), hepatitis C virus (HCV) infection ( 2 in CCA cases , control 6), liver cirrhosis ( 5 in CCA cases, control 7), liver flukes infestation ( 2 in CCA cases ,no ) |
| **Main results** |  | In the multivariate conditional logistic analysis showed that the relative odds of CCA were significantly elevated in subjects with a history of cholelithiasis (AOR = 1.70; 95% CI = 1.12-2.57; P = <0.011), CBD stones (choledocholithiasis) (AOR = 5.40; 95% CI = 2.05-14.21; P = <0.001), hepatolithiasis (AOR = 0.30; 95%Cl = 0.10-0.89; P = <0.031), cholecystectomy history (AOR = 0.49; 95% CI = 0.29-0.83; P = <0.008), thyroid diseases (AOR = 5.42; 95%Cl = 2.02-14.50; P = <0.001), HBV infection (AOR = 0.35; 95%Cl = 0.19-0.64; P = <0.001), and diabetes mellitus (AOR = 1.41; 95% CI = 1.17-1.70; P = <0.001). Diabetes mellitus Divided into two categories without complication (AOR = 0.21; 95% Cl = 0.11-0.40); P = <0.001), with complication (AOR = 0.46; 95% Cl = 0.22-0.99; P = <0.049) were the significant risk factors for CCA. Age (AOR = 1.02; 95%CI = 1.00-1.03; P = <0.016), smoking who one pack per day for >20 years (AOR = 0.27; 95%CI = 0.13-0.58; P = <0.001) which also were related to increased CCA risk factors. We observed that alcohol consumption (AOR = 1.57; 95%Cl = 0.98-2.52; P = 0.058), liver cirrhosis (AOR = 1.06; 95% CI = 0.29-3.87; P = 0.919) and HCV infection (AOR = 1.21; 95% CI = 0.19-7.46; P = 0.831) were not significantly associated with the CCA. In the conditional logistic regression model result of cholelithiasis (AOR = 1.51; 95%CI = 0.94-2.41; P = 0.083), CBD stones (choledocholithiasis) (AOR = 4.51; 95% CI = 1.70-11.98; P = 0.002); hepatolithiasis (AOR = 0.29; 95%Cl = 0.09-0.94; P = <0.040), thyroid diseases (AOR = 8.56; 95%Cl = 1.97-37.12; P = <0.004) were significant for eCCA. Diabetes mellitus (AOR = 1.30; 95%Cl = 1.05-1.61; P = <0.014), diabetes mellitus without complication (AOR = 0.43; 95%C l= 0.19-0.96; P = 0.041), was also a significant risk factor for eCCA but with complication diabetes mellitus (AOR = 0.70; 95%Cl = 0.28-1.78; P = 0.465) was not significant. Cigarette smoking one pack per day for more than 20 years (AOR = 0.36; 95%CI = 0.15-0.85; P = <0.021) was also a significant risk factor for eCCA. |
| **Other analyses** | **16** | We analyze the subgroup of cholangiocarcinoma, extrahepatic cholangiocarcinoma, intrahepatic cholangiocarcinoma. In the subgroup iCCA case 77 patients 44(57.1%) male, 33(42.9%) female and in control 154 cases, 79(51.3%) male ,75(48.7%) female. In the age group, age in 29-49 years16(20.8%) iCCA patients, and controls 43(27.9%) patients; age in 50-69 years 48(62.3%) iCCA patients, and controls 89(57.8%) patients; age in 70-89 years 40(23.8%) iCCA patients, and controls 22(14.3%) patients were conducted. The iCCA case and control groups had mean ages of 58.45 and 56.79 years, respectively. In the conditional logistic regression model, it was also found that Cholelithiasis (AOR = 4.91; 95%CI = 1.73-13.97; P = <0.003), cholecystectomy (AOR = 0.39; 95% CI = 0.15-0.99; P = 0.050), and hepatolithiasis (AOR = 0.34; 95% CI = (0.02-5.48); P = <0.020) were related to the iCCA. HBV infection (AOR = 0.20; 95%CI = 0.06-0.62; P = <0.006) was also a significant risk factor for iCCA. Cigarette smoking one pack per day for more than 20 years (AOR = 0.06; 95%CI = 0.01-0.56; P = 0.014) also was a significant risk factor for iCCA. However, diabetic mellitus (AOR = 3.01; 95%CI = 1.63-5.53; P = <0.001) is significant, but when for complication and without complication, diabetes mellitus is insignificant to correlate to iCCA where HCV also was not reach statistically significant to an enhanced risk of subtype iCCA. |
| **Discussion** | **17** | The underlying cause and carcinogenesis of CCA remain uncertain despite numerous identified risk factors. A hospital-based case-control study in China established that diabetes mellitus (DM) is an independent risk factor for cholangiocarcinoma (CCA), especially for the extrahepatic cholangiocarcinoma (eCCA), also for intrahepatic cholangiocarcinoma (iCCA), while diabetics mellitus with complications. Choledocholithiasis, hepatolithiasis, and diabetes mellitus are significantly connected with developing CCA in both subtypes, extrahepatic cholangiocarcinoma (eCCA) and intrahepatic cholangiocarcinoma (iCCA). While hepatitis B virus (HBV) infection is a risk factor for CCA, especially for iCCA, meanwhile, CBD stones are also risk factors for CCA, especially for eCCA. However, HCV did not reach a statistically significant level to enhance the risk of CCA. Moreover, a synergistic connection existed for the probability of CCA. Conducting an in-depth investigation to verify this synergistic relationship and clarify potential underlying mechanisms is essential. This synergy's fundamental mechanisms could be investigated to develop preventative methods for high-risk individuals who are at risk of CCA. |
| **Key results** | **18** | In this study, cholelithiasis, hepatolithiasis, CBD stones, HBV infection, and diabetes mellitus (DM) were independent risk factors for cholangiocarcinoma, especially for the extrahepatic cholangiocarcinoma (eCCA), and also for intrahepatic cholangiocarcinoma (iCCA). Cholangiocarcinoma preventive techniques for high-risk individuals may be developed by investigating the fundamental processes behind this synergy. |
| **Limitations** | **19** | Case-control studies, due to their typically retrospective nature, can be used to establish a correlation between exposures and outcomes, but cannot establish causation. These studies simply attempt to find correlations between past events and the current state. The current study possesses several potential limitations: diagnostic bias cannot be dismissed as cancer patients undergo supplementary testing, resulting in a higher number of diagnoses compared to non-cancer individuals; this was a hospital-based study conducted at a single institution rather than a population-based design, which introduces the possibility of selection bias due to varying referral patterns; nevertheless, a hospital-based design may be more suitable for CCA given the low incidence and brief survival of CCA patients. The study did not examine hepatitis B core antibody (anti-HBc) or occult HBV infection; nevertheless, subsequent research has shown minimal levels of HBV DNA in individuals with just anti-HBc (absent surface antigen/antibody) and a very low occurrence of occult HBV infection. Moreover, the prevalence of HBV identified in this study was consistent with prior HBV prevalence estimates in China. Additionally, DM was not categorized by type. Given the lack of young-onset (≤ 30 years) DM in our cohort and the significantly lower incidence of type 1 DM in Asia. It is inferred that most DM cases in this study were type 2 DM. |
| **Interpretation** | **20** | This study revealed several significant findings regarding the relationship between cholelithiasis and cholangiocarcinoma (CCA): CBD stones were identified as a risk factor for extrahepatic cholangiocarcinoma (eCCA) but not for intrahepatic cholangiocarcinoma (iCCA); Cholelithiasis was a risk factor for both eCCA and iCCA and hepatolithiasis was a risk factor for iCCA and eCCA. These findings may be attributed to the effects of cholestasis, altered bile composition, and chronic proliferative inflammation in proximity to the stone-bearing ducts. Previous studies conducted in China have also demonstrated the association between hepatolithiasis and eCCA, further supporting our findings. This study discovered an association between diabetes mellitus and cholangiocarcinoma, possibly due to insulin resistance and hyperinsulinemia. High insulin-like growth factor 1 levels may promote liver cell development. Diabetes and hepatitis B virus infection increase cholangiocarcinoma risk effectively. Hyperglycemia causes oxidative stress, which increases HBV gene expression, triggers viral replication, and contributes to chronicity of liver disease. Despite limitations, this study investigates risk factors for cholangiocarcinoma (eCCA and iCCA) in China using a multivariable framework. It stratifies biliary lithiasis and diabetes mellitus based on complications and location. This is the first study to investigate the impact of complicated and uncomplicated diabetes mellitus on cholangiocarcinoma risk. The study has the potential for stratifying patients at risk and developing surveillance algorithms. Cholangiocarcinoma preventive techniques for high-risk individuals may be developed by investigating the fundamental processes behind this synergy. |
| **Generalisability** | **21** | To summarize, cholelithiasis, hepatolithiasis, CBD stones, HBV infection, and diabetes mellitus were independent risk factors for cholangiocarcinoma. Besides biliary lithiasis (CBD stones) and HBV infection, all are risk factors for both iCCA and eCCA, but CBD stones are a risk factor for eCCA, and HBV infections are independent risk factors for iCCA. Moreover, a synergistic connection existed between the two parameters for the probability of CCA. Conducting an in-depth investigation to verify this synergistic relationship and clarify potential underlying mechanisms is essential. This synergy's fundamental mechanisms could be investigated to develop preventative methods for high-risk individuals who are at risk of developing CCA. |
| **Other information** |  |  |
| **Funding** | **22** | The authors received no financial support for this research, authorship, and/or publication of this article.  The articles financially supported by the Heilongjiang Province's important research Project for the publication of this article grant number: 2024ZX12C21 |
